# Supplementary material
Source: Springer Nature journal article supplement (https://www.springermedizin.de/resource/supplementary/13031_2009_37_MOESM1_ESM.pdf/9644984)

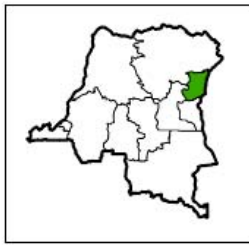

**LEGEND**

- Capital
- Town
- Village
- ▲ Volcano
- ✈ Airport
- Lake
- Roads

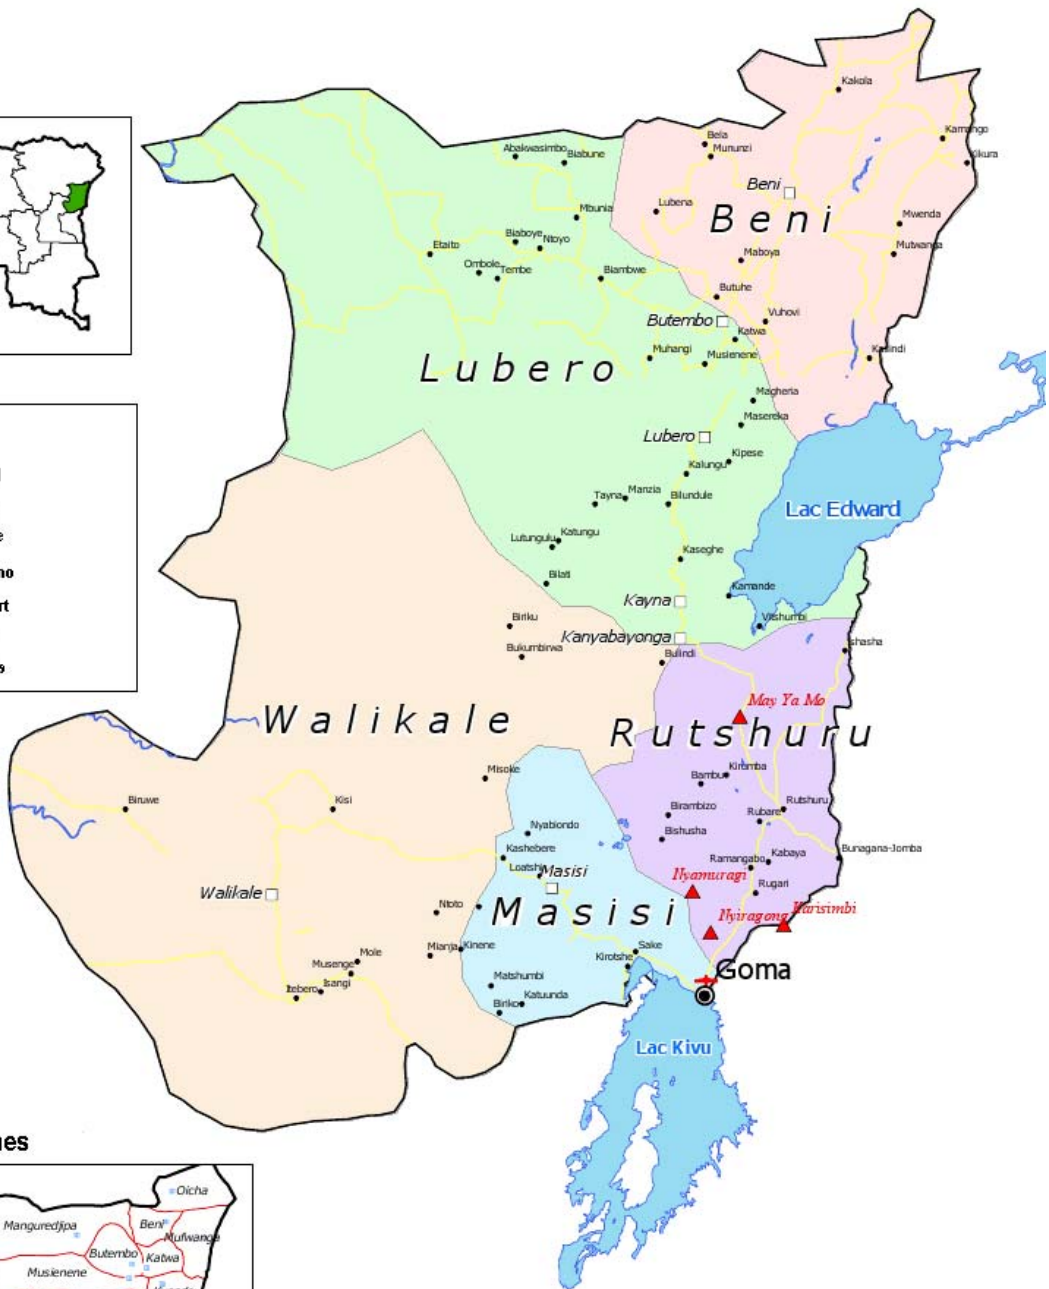

**Health Zones**

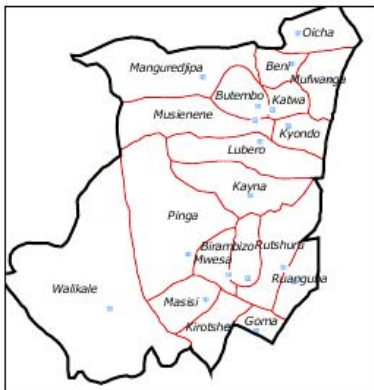

Sources: DCW, MoI, OMS, BCD, IGC

The boundaries and names displayed on this map do not imply official recognition by the United Nations

OCHA DRC Geographic (WGS84) April 2002

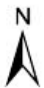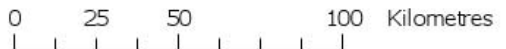

Supplement: MOESM1 [file 9644984]
